# Supplementary material for: Ozone (O 3 ) observations in Saxony, Germany, for 1997–2020: trends, modelling and implications for O 3 control
Source: Copernicus journal article supplement (doi:10.5194/acp-25-8907-2025), 2025-08-14
Supplement: Supplementary file 1 [file acp-25-8907-2025-supplement.pdf]

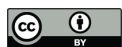

*Supplement of*

## **Ozone (O<sub>3</sub>) observations in Saxony, Germany, for 1997–2020: trends, modelling and implications for O<sub>3</sub> control**

**Yaru Wang et al.**

*Correspondence to:* Hartmut Herrmann ([herrmann@tropos.de](mailto:herrmann@tropos.de))

The copyright of individual parts of the supplement might differ from the article licence.

# Ozone (O<sub>3</sub>) observations in Saxony, Germany for 1997 - 2020: Trends, modelling and implications for O<sub>3</sub> control

Yaru Wang<sup>1</sup>, Dominik van Pinxteren<sup>1</sup>, Andreas Tilgner<sup>1</sup>, Erik Hans Hoffmann<sup>1</sup>, Max Hell<sup>1</sup>, Susanne Bastian<sup>2</sup>, Hartmut Herrmann<sup>1\*</sup>

<sup>1</sup>Atmospheric Chemistry Department (ACD), Leibniz Institute for Tropospheric Research (TROPOS), Permoserstr. 15, Leipzig, 04318, Germany

<sup>2</sup>Saxon State Office for the Environment, Agriculture, and Geology (LfULG), Pillnitzer Platz 3, Dresden Pillnitz, 01326, Germany

Correspondence to: Hartmut Herrmann (herrmann@tropos.de)

**Table S1. Data availability and proportion of missing data of hourly concentrations of ozone in the Saxony air quality measurement network used in the project.**

| Station           | Station type | Begin time       | End time         | Years | Missing values / % |
|-------------------|--------------|------------------|------------------|-------|--------------------|
| DD-Nord           | Traffic      | 01.01.1997 00:00 | 31.12.2020 23:00 | 24    | 3.2                |
| Annaberg          | Urban        | 02.01.1997 00:00 | 31.12.2020 23:00 | 24    | 2.3                |
| Bautzen           | Urban        | 01.01.2005 00:00 | 31.12.2020 23:00 | 16    | 0.9                |
| DD-Winkelmannstr. | Urban        | 19.06.2008 23:00 | 31.12.2020 23:00 | 12.5  | 1.1                |
| L-Thekla          | Urban        | 02.04.2004 00:00 | 29.04.2020 18:00 | 16.1  | 1.6                |
| L-West            | Urban        | 01.01.2000 00:00 | 31.12.2020 23:00 | 21    | 1.8                |
| Plauen-DWD        | Urban        | 20.11.2003 13:00 | 14.07.2020 08:00 | 16.7  | 2.5                |
| Zittau-Ost        | Urban        | 10.01.1997 12:00 | 31.12.2020 23:00 | 24    | 2.3                |
| Collmberg         | Rural        | 30.09.1998 11:00 | 31.12.2020 23:00 | 22.3  | 2.1                |
| Niesky            | Rural        | 05.05.2003 15:00 | 31.12.2020 23:00 | 17.7  | 1.4                |
| Radebeul-Wahnsd.  | Rural        | 01.01.1974 00:00 | 31.12.2020 23:00 | 47    | 3.3                |
| Schkeuditz        | Rural        | 06.06.2003 13:00 | 31.12.2020 23:00 | 17.6  | 1                  |
| Carlsfeld         | Mountain     | 01.01.1997 00:00 | 31.12.2020 23:00 | 24    | 2.3                |
| Fichtelberg       | Mountain     | 01.01.1997 00:00 | 31.12.2020 23:00 | 24    | 4.7                |
| Schwartenberg     | Mountain     | 11.02.1998 14:00 | 31.12.2020 23:00 | 22.9  | 2.1                |
| Zinnwald          | Mountain     | 02.01.1997 09:00 | 31.12.2020 23:00 | 24    | 2                  |

**Table S2: Availability of further measurement parameters (O<sub>3</sub>, NO, NO<sub>2</sub>, NO<sub>x</sub>, temperature (T), global radiation (GR), relative humidity (RH), wind direction (WD), wind speed (WS), and air pressure) per station.**

| Station           | Station type | O <sub>3</sub> | NO | NO <sub>2</sub> | NO <sub>x</sub> | T | GR | RH | WD | WS | Air pressure |
|-------------------|--------------|----------------|----|-----------------|-----------------|---|----|----|----|----|--------------|
| DD-Nord           | Traffic      | x              | x  | x               | x               | x | x  | x  | x  | x  | x            |
| Annaberg          | Urban        | x              | x  | x               | x               | x | x  | x  | x  | x  | x            |
| Bautzen           | Urban        | x              | x  | x               | x               | x | x  | x  | x  | x  | x            |
| DD-Winkelmannstr. | Urban        | x              | x  | x               | x               | x | x  | x  | x  | x  | x            |
| L-Thekla          | Urban        | x              |    |                 |                 | x | x  | x  | x  | x  | x            |
| L-West            | Urban        | x              | x  | x               | x               | x | x  | x  | x  | x  | x            |
| Plauen-DWD        | Urban        | x              |    |                 |                 | x | x  | x  | x  | x  | x            |
| Zittau-Ost        | Urban        | x              | x  | x               | x               | x | x  | x  | x  | x  | x            |
| Collmberg         | Rural        | x              | x  | x               | x               | x | x  | x  | x  | x  | x            |
| Niesky            | Rural        | x              | x  | x               | x               | x | x  | x  | x  | x  | x            |
| Radebeul-Wahnsd.  | Rural        | x              | x  | x               | x               | x | x  | x  | x  | x  | x            |
| Schkeuditz        | Rural        | x              | x  | x               | x               | x | x  | x  | x  | x  | x            |
| Carlsfeld         | Mountain     | x              |    |                 |                 | x | x  | x  | x  | x  | x            |
| Fichtelberg       | Mountain     | x              |    |                 |                 | x | x  | x  | x  | x  | x            |
| Schwartenberg     | Mountain     | x              | x  | x               | x               | x | x  | x  | x  | x  | x            |

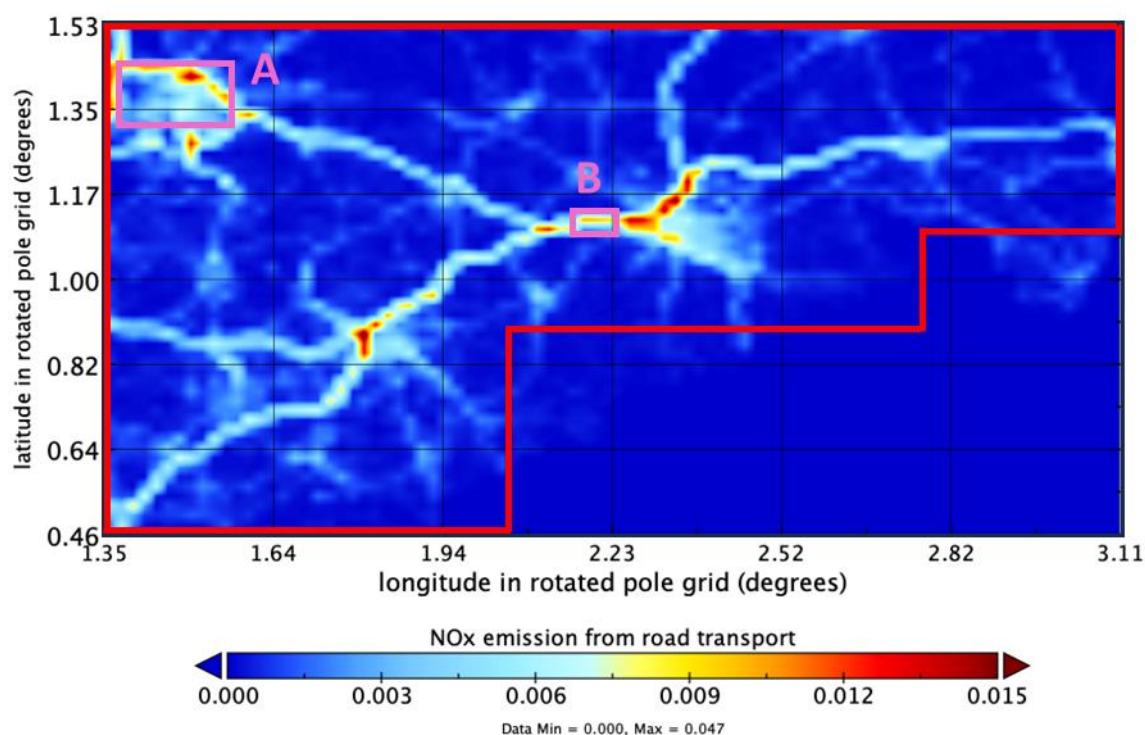

Figure S1: The NO<sub>x</sub> emission (in kg m<sup>-2</sup>) from road transport in the entire Saxony state region in 2019. A continuous red frame indicates the entire simulated Saxony area. Two specific rectangles in rose pink, A and B, represent the representative urban area (city of Leipzig) (0.13° × 0.20°) and traffic-dominated area (highway close to Dresden) (0.07° × 0.10°) used for the simulation, respectively. The covered region indicated with the continuous red frame in Fig. S1 corresponds to the Saxony area in Fig. 1. To convert geographic coordinates to rotated pole coordinates in the figure, the position of the rotated pole (170°W, 40°N) is first defined. The package *pyproj* in *Python* (Python Software Foundation, 2021) is then used to set up the coordinate systems. A transformer is created to convert coordinates from the geographic system (WGS84) to the rotated grid. Once the geographic coordinates are provided, they are automatically transformed into rotated pole latitude and longitude.

Table S3. The annual emission data in 2019 for the entire Saxony region in summer and winter simulation scenarios. Each species is given by its SMILES string, and its IUPAC name generated using the PubChemPy package in Python (<https://pubchempy.readthedocs.io/en/latest/>), along with the corresponding chemical structure. It is noted that for some compounds, IUPAC names could not be retrieved from the PubChem database by the tool and they are therefore left blank.

See attached Excel file named *Table S3\_ The annual emission data in 2019 for the entire Saxony region*.

Table S4. Modelling configuration and settings for summer and winter scenarios.

| Model setting                    | Unit | Summer                   | Winter                      | Reference |
|----------------------------------|------|--------------------------|-----------------------------|-----------|
| Initial time                     |      | 00:00 CET, 14 July, 2019 | 00:00 CET, 14 January, 2019 |           |
| <b>Meteorological conditions</b> |      |                          |                             |           |
| Temperature                      | °C   | 15                       | 4                           | Measured  |
| Pressure                         | hPa  | 1000                     | 1000                        | Measured  |
| Relative humidity                | %    | 70                       | 70                          | Measured  |
| Ratio of Solar radiation*        |      | 0.7                      | 0.4                         | Measured  |
| <b>Dry deposition velocity</b>   |      |                          |                             |           |

|                                    |                    |      |      |                        |
|------------------------------------|--------------------|------|------|------------------------|
| NO <sub>2</sub>                    | cm s <sup>-1</sup> | 0.3  | 3    | Rondón et al. (1993)   |
| N <sub>2</sub> O <sub>5</sub>      | cm s <sup>-1</sup> | 100  | 2    | Hoffmann et al. (2019) |
| O <sub>3</sub>                     | cm s <sup>-1</sup> | 0.8  | 0.08 | Clifton et al. (2020)  |
| NO                                 | cm s <sup>-1</sup> | 0.05 | 0.05 | Zhu et al. (2020)      |
| HNO <sub>3</sub>                   | cm s <sup>-1</sup> | 3.5  | 3.5  | Zhu et al. (2020)      |
| H <sub>2</sub> O <sub>2</sub>      | cm s <sup>-1</sup> | 1    | 1    | Zhu et al. (2020)      |
| CO                                 | cm s <sup>-1</sup> | 0.1  | 0.1  | Zhu et al. (2020)      |
| HCl                                | cm s <sup>-1</sup> | 1    | 1    | Zhu et al. (2020)      |
| NH <sub>3</sub>                    | cm s <sup>-1</sup> | 1    | 1    | Zhu et al. (2020)      |
| SO <sub>2</sub>                    | cm s <sup>-1</sup> | 1    | 1    | Zhu et al. (2020)      |
| H <sub>2</sub> SO <sub>4</sub>     | cm s <sup>-1</sup> | 2    | 2    | Zhu et al. (2020)      |
| HCHO                               | cm s <sup>-1</sup> | 1    | 1    | Zhu et al. (2020)      |
| CH <sub>3</sub> OH                 | cm s <sup>-1</sup> | 1    | 1    | Zhu et al. (2020)      |
| CH <sub>3</sub> CH <sub>2</sub> OH | cm s <sup>-1</sup> | 0.5  | 0.5  | Zhu et al. (2020)      |
| PANs                               | cm s <sup>-1</sup> | 0.7  | 0.7  | Wu et al. (2012)       |
| CHClO                              | cm s <sup>-1</sup> | 0.2  | 0.2  | Hoffmann et al. (2019) |
| CHBrO                              | cm s <sup>-1</sup> | 0.2  | 0.2  | Hoffmann et al. (2019) |

#### Boundary layer heights (BLHs)

|                |   |     |      |
|----------------|---|-----|------|
| Daytime BLHs   | m | 500 | 2000 |
| Nighttime BLHs | m | 250 | 1000 |

#### Measured Chemical data

|                 |     |       |       |                             |
|-----------------|-----|-------|-------|-----------------------------|
| O <sub>3</sub>  | ppb | 31.7  | 21.6  | Measured                    |
| NO <sub>2</sub> | ppb | 3.4   | 7.0   | Measured                    |
| SO <sub>2</sub> | ppb | 1.1   | 1.9   | UBA website                 |
| CO              | ppb | 153.4 | 153.4 | Zellweger et al. (2009)     |
| CH <sub>4</sub> | ppb | 1700  | 1700  | Herrmann et al. (2000)      |
| HONO            | ppb | 0.5   | 0.5   | Stieger et al. (2018)       |
| PAN             | ppb | 0.5   | 0.5   | Pandey Deolal et al. (2014) |

\* Ratio of solar radiation, defined as the mean value between 10:00 and 14:00 (CET) divided by the maximum clear sky radiation value during the same period.

**Table S5. Dominant initial gas-phase concentrations applied in the final 24-hour simulations for summer and winter scenarios. Each species is given by its SMILES string, and its IUPAC name generated using the PubChemPy package in Python (<https://pubchempy.readthedocs.io/en/latest/>), along with the corresponding chemical structure. It is noted that for some compounds, IUPAC names could not be retrieved from the PubChem database by the tool and they are therefore left blank.**

See attached Excel file named *Table S5\_Dominant initial gas-phase concentrations*.

**Table S6. Changing the emission multiplier for NO<sub>x</sub> and TNMVOC in the simulations. Two or three batches were conducted for each season, considering each combination, with each batch comprising 400 model runs. The total number of simulations is 800 for summer and 1200 for winter.**

| Batch 1 (Summer/Winter) |                 |        | Batch 2 (Summer/Winter) |                 |        | Batch 3 (Winter) |                 |        |
|-------------------------|-----------------|--------|-------------------------|-----------------|--------|------------------|-----------------|--------|
| Number                  | Emission factor |        | Number                  | Emission factor |        | Number           | Emission factor |        |
|                         | NO <sub>x</sub> | TNMVOC |                         | NO <sub>x</sub> | TNMVOC |                  | NO <sub>x</sub> | TNMVOC |
| 1                       | 0.001           | 0.001  | 1                       | 1.5             | 1.5    | 1                | 1.5             | 13     |
| 2                       | 0.005           | 0.005  | 2                       | 2               | 2      | 2                | 2               | 14     |
| 3                       | 0.01            | 0.01   | 3                       | 2.5             | 2.5    | 3                | 2.5             | 16     |
| 4                       | 0.05            | 0.05   | 4                       | 3               | 3      | 4                | 3               | 17     |
| 5                       | 0.1             | 0.1    | 5                       | 3.5             | 3.5    | 5                | 3.5             | 18     |

|                         |     |     |     |      |      |     |      |    |
|-------------------------|-----|-----|-----|------|------|-----|------|----|
| 6                       | 0.5 | 0.5 | 6   | 4    | 4    | 6   | 4    | 19 |
| 7                       | 1   | 1   | 7   | 4.5  | 4.5  | 7   | 4.5  | 21 |
| 8                       | 5   | 5   | 8   | 5.5  | 5.5  | 8   | 5.5  | 22 |
| 9                       | 10  | 10  | 9   | 6    | 6    | 9   | 6    | 23 |
| 10                      | 15  | 15  | 10  | 6.5  | 6.5  | 10  | 6.5  | 24 |
| 11                      | 20  | 20  | 11  | 7    | 7    | 11  | 7    | 26 |
| 12                      | 25  | 25  | 12  | 7.5  | 7.5  | 12  | 7.5  | 27 |
| 13                      | 30  | 30  | 13  | 8    | 8    | 13  | 8    | 28 |
| 14                      | 35  | 35  | 14  | 8.5  | 8.5  | 14  | 8.5  | 29 |
| 15                      | 40  | 40  | 15  | 9    | 9    | 15  | 9    | 30 |
| 16                      | 45  | 45  | 16  | 9.5  | 9.5  | 16  | 9.5  | 31 |
| 17                      | 50  | 50  | 17  | 10.5 | 10.5 | 17  | 10.5 | 32 |
| 18                      | 60  | 60  | 18  | 11   | 11   | 18  | 11   | 33 |
| 19                      | 70  | 70  | 19  | 11.5 | 11.5 | 19  | 11.5 | 34 |
| 20                      | 80  | 80  | 20  | 12   | 12   | 20  | 12   | 35 |
| Total simulation number |     |     | 400 |      |      | 400 |      |    |

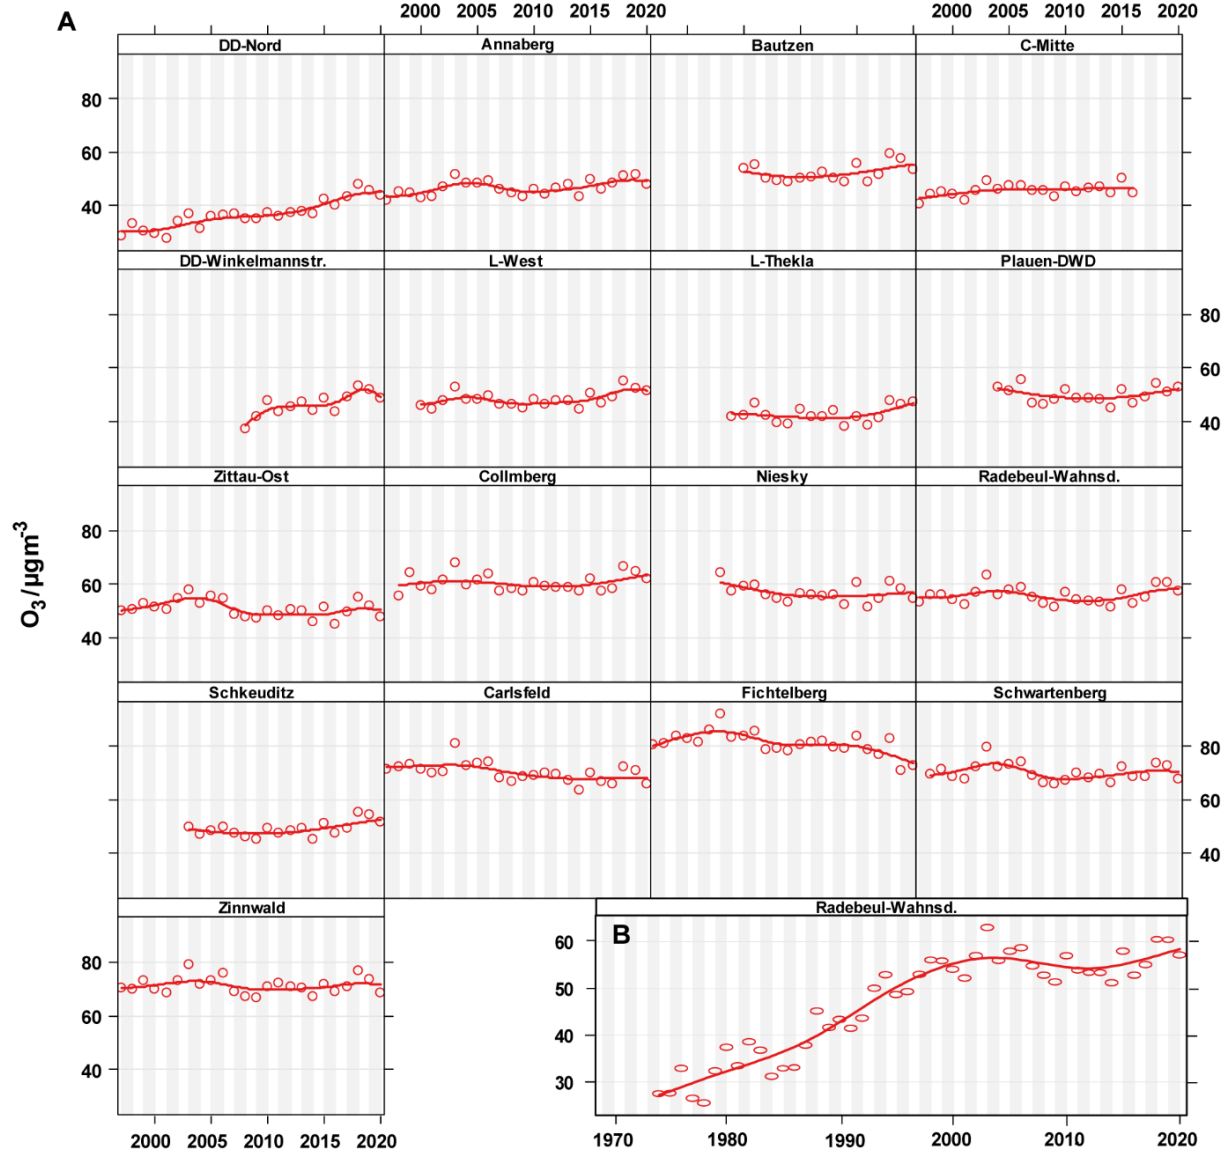

Figure S2: Smooth trends in annual means of O<sub>3</sub> for A) all stations from 1997 (or later) to 2020 and B) Radebeul-Wahnsdorf from 1974 - 2020.

**Table S7. Trends of the mean ozone concentration at the stations of the Saxony air quality monitoring network for three different time periods. Statistically non-significant values with  $p > 0.05$  are put in brackets. \* means the years begin from 2008.**

| Station           | Station type | All available years                    |                      | 15 years                               |                      | 10 years                               |                      |
|-------------------|--------------|----------------------------------------|----------------------|----------------------------------------|----------------------|----------------------------------------|----------------------|
|                   |              | 1997 (or later) until 2020             |                      | 2006 to 2020                           |                      | 2011 to 2020                           |                      |
|                   |              | abs. Trend                             | rel. Trend           | abs. Trend                             | rel. Trend           | abs. Trend                             | rel. Trend           |
|                   |              | $\mu\text{g m}^{-3} \text{ year}^{-1}$ | % year <sup>-1</sup> | $\mu\text{g m}^{-3} \text{ year}^{-1}$ | % year <sup>-1</sup> | $\mu\text{g m}^{-3} \text{ year}^{-1}$ | % year <sup>-1</sup> |
| DD-Nord           | Traffic      | 0.65                                   | 2.30                 | 0.75                                   | 2.27                 | 1.19                                   | 3.50                 |
| Annaberg          | Urban        | 0.17                                   | 0.38                 | 0.28                                   | 0.63                 | 0.51                                   | 1.14                 |
| Bautzen           | Urban        | 0.24                                   | 0.47                 | 0.35                                   | 0.72                 | 0.59                                   | 1.19                 |
| DD-Winkelmannstr. | Urban        | 0.65                                   | 1.57                 | 0.65*                                  | 1.57*                | 0.74                                   | 1.75                 |
| L-West            | Urban        | 0.19                                   | 0.42                 | 0.38                                   | 0.83                 | 0.64                                   | 1.42                 |
| L-Thekla          | Urban        | (0.15)                                 | (0.37)               | (0.13)                                 | (0.32)               | 0.51                                   | 1.28                 |
| Plauen-DWD        | Urban        | (-0.09)                                | (-0.17)              | (0.09)                                 | (0.20)               | (0.41)                                 | (0.85)               |
| Zittau-Ost        | Urban        | -0.14                                  | -0.27                | (0.03)                                 | (0.06)               | (0.24)                                 | (0.51)               |
| Collnberg         | Rural        | (-0.03)                                | (-0.05)              | 0.26                                   | 0.45                 | 0.53                                   | 0.92                 |
| Niesky            | Rural        | (-0.13)                                | (-0.23)              | (0.05)                                 | (0.10)               | (0.15)                                 | (0.28)               |
| Radebeul-Wahnsd.  | Rural        | (0.05)                                 | (0.09)               | 0.27                                   | 0.52                 | 0.71                                   | 1.38                 |
| Schkeuditz        | Rural        | 0.25                                   | 0.53                 | 0.43                                   | 0.93                 | 0.68                                   | 1.49                 |
| Carlsfeld         | Mountain     | -0.26                                  | -0.35                | (-0.12)                                | (-0.17)              | (0.00)                                 | (-0.01)              |
| Fichtelberg       | Mountain     | -0.31                                  | -0.37                | -0.37                                  | -0.45                | -0.79                                  | -0.95                |
| Schwartenberg     | Mountain     | (-0.05)                                | (-0.06)              | (0.15)                                 | (0.22)               | (0.26)                                 | (0.37)               |
| Zinnwald          | Mountain     | (-0.02)                                | (-0.03)              | (0.15)                                 | (0.22)               | (0.14)                                 | (0.20)               |

**Table S8. Trends for all available years since 1997, 15 years from 2006 to 2020 and 10 years from 2011 to 2020 of NO<sub>x</sub> (A), NO (B), NO<sub>2</sub> (C), and O<sub>3</sub> (D). Statistically non-significant values with  $p > 0.05$  are put in brackets. \* means the years begin from 2008.**

(A)

| NO <sub>x</sub>   |              | All available years                    |                      | 15 years                               |                      | 10 years                               |                      |
|-------------------|--------------|----------------------------------------|----------------------|----------------------------------------|----------------------|----------------------------------------|----------------------|
|                   |              | 1997 or later - 2020                   |                      | 2006 - 2020                            |                      | 2011 - 2020                            |                      |
| Station           | Station type | abs. Trend                             | rel. Trend           | abs. Trend                             | rel. Trend           | abs. Trend                             | rel. Trend           |
|                   |              | $\mu\text{g m}^{-3} \text{ year}^{-1}$ | % year <sup>-1</sup> | $\mu\text{g m}^{-3} \text{ year}^{-1}$ | % year <sup>-1</sup> | $\mu\text{g m}^{-3} \text{ year}^{-1}$ | % year <sup>-1</sup> |
| DD-Nord           | Traffic      | -2.96                                  | -2.57                | -3.32                                  | -3.54                | -3.83                                  | -4.77                |
| Annaberg          | Urban        | -1.66                                  | -2.46                | -1.60                                  | -2.98                | -1.56                                  | -3.42                |
| Bautzen           | Urban        | -1.13                                  | -3.09                | -1.13                                  | -3.19                | -1.32                                  | -4.27                |
| DD-Winkelmannstr. | Urban        | -0.90                                  | -2.75                | -0.90*                                 | -2.75*               | -0.90                                  | -3.03                |
| L-West            | Urban        | -0.57                                  | -1.88                | -0.58                                  | -2.17                | -0.75                                  | -3.06                |
| L-Thekla          | Urban        |                                        |                      |                                        |                      |                                        |                      |
| Plauen-DWD        | Urban        |                                        |                      |                                        |                      |                                        |                      |
| Zittau-Ost        | Urban        | -0.30                                  | -1.35                | -0.22                                  | -1.18                | -0.50                                  | -2.59                |
| Collnberg         | Rural        | -0.31                                  | -1.89                | -0.36                                  | -2.55                | -0.37                                  | -2.99                |
| Niesky            | Rural        | -0.24                                  | -2.04                | -0.24                                  | -2.04                | -0.15                                  | -1.41                |
| Radebeul-Wahnsd.  | Rural        | -0.44                                  | -1.77                | -0.48                                  | -2.26                | -0.56                                  | -2.97                |
| Schkeuditz        | Rural        |                                        |                      |                                        |                      |                                        |                      |
| Carlsfeld         | Mountain     |                                        |                      |                                        |                      |                                        |                      |
| Fichtelberg       | Mountain     |                                        |                      |                                        |                      |                                        |                      |

|               |          |       |       |       |       |       |       |
|---------------|----------|-------|-------|-------|-------|-------|-------|
| Schwartenberg | Mountain | -0.36 | -2.13 | -0.40 | -2.91 | -0.30 | -2.71 |
| Zinnwald      | Mountain | -0.40 | -2.22 | -0.46 | -3.27 | -0.32 | -2.92 |

**(B)**

| NO                |              | All available years                    |                      | 15 years                               |                      | 10 years                               |                      |
|-------------------|--------------|----------------------------------------|----------------------|----------------------------------------|----------------------|----------------------------------------|----------------------|
|                   |              | 1997 or later - 2020                   |                      | 2006 - 2020                            |                      | 2011 - 2020                            |                      |
| Station           | Station type | abs. Trend                             | rel. Trend           | abs. Trend                             | rel. Trend           | abs. Trend                             | rel. Trend           |
|                   |              | $\mu\text{g m}^{-3} \text{ year}^{-1}$ | % year <sup>-1</sup> | $\mu\text{g m}^{-3} \text{ year}^{-1}$ | % year <sup>-1</sup> | $\mu\text{g m}^{-3} \text{ year}^{-1}$ | % year <sup>-1</sup> |
| DD-Nord           | Traffic      | -1.22                                  | -2.93                | -1.27                                  | -4.02                | -1.49                                  | -5.53                |
| Annaberg          | Urban        | -0.65                                  | -2.78                | -0.60                                  | -3.33                | -0.70                                  | -4.61                |
| Bautzen           | Urban        | -0.29                                  | -3.46                | -0.29                                  | -3.62                | -0.31                                  | -4.59                |
| DD-Winkelmannstr. | Urban        | -0.11                                  | -2.09                | -0.11*                                 | -2.09*               | -0.15                                  | -2.96                |
| L-West            | Urban        | -0.07                                  | -1.62                | -0.05                                  | -1.34                | -0.10                                  | -2.74                |
| L-Thekla          | Urban        |                                        |                      |                                        |                      |                                        |                      |
| Plauen-DWD        | Urban        |                                        |                      |                                        |                      |                                        |                      |
| Zittau-Ost        | Urban        | -0.02                                  | -0.78                | -0.01                                  | -0.60                | -0.10                                  | -2.98                |
| Collmberg         | Rural        | -0.01                                  | -0.44                | 0.00                                   | -0.18                | -0.01                                  | -0.48                |
| Niesky            | Rural        | -0.01                                  | -0.85                | -0.01                                  | -0.85                | -0.02                                  | -1.26                |
| Radebeul-Wahnsd.  | Rural        | -0.03                                  | -1.07                | -0.02                                  | -0.90                | -0.05                                  | -2.04                |
| Schkeuditz        | Rural        |                                        |                      |                                        |                      |                                        |                      |
| Carlsfeld         | Mountain     |                                        |                      |                                        |                      |                                        |                      |
| Fichtelberg       | Mountain     |                                        |                      |                                        |                      |                                        |                      |
| Schwartenberg     | Mountain     | -0.01                                  | -0.69                | -0.01                                  | -1.01                | -0.02                                  | -1.53                |
| Zinnwald          | Mountain     | -0.02                                  | -1.24                | -0.01                                  | -0.99                | (-0.01)                                | (-0.43)              |

60

**(C)**

| NO <sub>2</sub>   |              | All available years                    |                      | 15 years                               |                      | 10 years                               |                      |
|-------------------|--------------|----------------------------------------|----------------------|----------------------------------------|----------------------|----------------------------------------|----------------------|
|                   |              | 1997 or later - 2020                   |                      | 2006 - 2020                            |                      | 2011 - 2020                            |                      |
| Station           | Station type | abs. Trend                             | rel. Trend           | abs. Trend                             | rel. Trend           | abs. Trend                             | rel. Trend           |
|                   |              | $\mu\text{g m}^{-3} \text{ year}^{-1}$ | % year <sup>-1</sup> | $\mu\text{g m}^{-3} \text{ year}^{-1}$ | % year <sup>-1</sup> | $\mu\text{g m}^{-3} \text{ year}^{-1}$ | % year <sup>-1</sup> |
| DD-Nord           | Traffic      | -1.06                                  | -2.06                | -1.40                                  | -3.10                | -1.56                                  | -3.99                |
| Annaberg          | Urban        | -0.65                                  | -2.02                | -0.69                                  | -2.61                | -0.57                                  | -2.54                |
| Bautzen           | Urban        | -0.68                                  | -2.82                | -0.68                                  | -2.95                | -0.78                                  | -3.84                |
| DD-Winkelmannstr. | Urban        | -0.63                                  | -2.65                | -0.63*                                 | -2.65*               | -0.58                                  | -2.71                |
| L-West            | Urban        | -0.45                                  | -1.91                | -0.51                                  | -2.39                | -0.57                                  | -3.04                |
| L-Thekla          | Urban        |                                        |                      |                                        |                      |                                        |                      |

|                  |          |       |       |       |       |         |         |
|------------------|----------|-------|-------|-------|-------|---------|---------|
| Plauen-DWD       | Urban    |       |       |       |       |         |         |
| Zittau-Ost       | Urban    | -0.26 | -1.50 | -0.25 | -1.64 | -0.32   | -2.24   |
| Collmberg        | Rural    | -0.29 | -2.04 | -0.35 | -2.83 | -0.34   | -3.33   |
| Niesky           | Rural    | -0.21 | -2.25 | -0.21 | -2.25 | (-0.10) | (-1.20) |
| Radebeul-Wahnsd. | Rural    | -0.39 | -1.86 | -0.44 | -2.48 | -0.51   | -3.25   |
| Schkeuditz       | Rural    |       |       |       |       |         |         |
| Carlsfeld        | Mountain |       |       |       |       |         |         |
| Fichtelberg      | Mountain |       |       |       |       |         |         |
| Schwartenberg    | Mountain | -0.33 | -2.34 | -0.38 | -3.28 | -0.29   | -3.23   |
| Zinnwald         | Mountain | -0.36 | -2.39 | -0.43 | -3.77 | -0.35   | -3.89   |

(D)

| O <sub>x</sub>    |              | All available years                   |                      | 15 years                              |                      | 10 years                              |                      |
|-------------------|--------------|---------------------------------------|----------------------|---------------------------------------|----------------------|---------------------------------------|----------------------|
|                   |              | 1997 or later - 2020                  |                      | 2006 - 2020                           |                      | 2011 - 2020                           |                      |
| Station           | Station type | abs. Trend                            | rel. Trend           | abs. Trend                            | rel. Trend           | abs. Trend                            | rel. Trend           |
|                   |              | µg m <sup>-3</sup> year <sup>-1</sup> | % year <sup>-1</sup> | µg m <sup>-3</sup> year <sup>-1</sup> | % year <sup>-1</sup> | µg m <sup>-3</sup> year <sup>-1</sup> | % year <sup>-1</sup> |
| DD-Nord           | Traffic      | -0.21                                 | -0.52                | -0.33                                 | -0.82                | -0.26                                 | -0.68                |
| Annaberg          | Urban        | -0.24                                 | -0.62                | -0.23                                 | -0.63                | (-0.09)                               | (-0.25)              |
| Bautzen           | Urban        | -0.25                                 | -0.67                | -0.21                                 | -0.56                | (-0.20)                               | (-0.55)              |
| DD-Winkelmannstr. | Urban        | (-0.07)                               | (-0.22)              | (-0.07) *                             | (-0.22) *            | (-0.03)                               | (-0.07)              |
| L-West            | Urban        | -0.14                                 | -0.40                | (-0.10)                               | (-0.28)              | (-0.07)                               | (-0.21)              |
| L-Thekla          | Urban        |                                       |                      |                                       |                      |                                       |                      |
| Plauen-DWD        | Urban        |                                       |                      |                                       |                      |                                       |                      |
| Zittau-Ost        | Urban        | -0.22                                 | -0.63                | -0.14                                 | -0.43                | (-0.13)                               | (-0.41)              |
| Collmberg         | Rural        | -0.16                                 | -0.43                | (-0.08)                               | (-0.24)              | -0.02                                 | -0.05                |
| Niesky            | Rural        | (-0.13)                               | (-0.40)              | (-0.13)                               | (-0.40)              | (-0.04)                               | (-0.12)              |
| Radebeul-Wahnsd.  | Rural        | -0.17                                 | -0.45                | -0.10                                 | -0.29                | -0.03                                 | -0.10                |
| Schkeuditz        | Rural        |                                       |                      |                                       |                      |                                       |                      |
| Carlsfeld         | Mountain     |                                       |                      |                                       |                      |                                       |                      |
| Fichtelberg       | Mountain     |                                       |                      |                                       |                      |                                       |                      |
| Schwartenberg     | Mountain     | -0.20                                 | -0.46                | -0.17                                 | -0.41                | (-0.08)                               | (-0.21)              |
| Zinnwald          | Mountain     | -0.18                                 | -0.42                | -0.17                                 | -0.43                | (-0.16)                               | (-0.41)              |



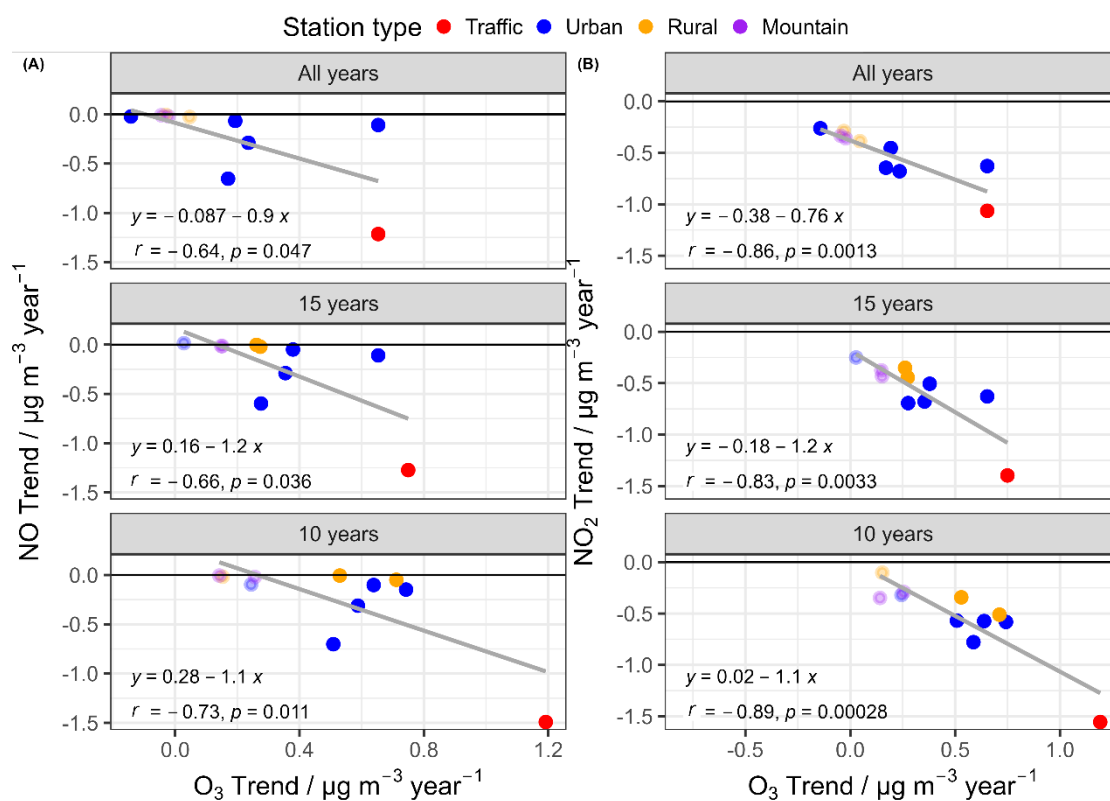

65 **Figure S3: Relationships between O<sub>3</sub> trends and NO, NO<sub>2</sub> trends across all stations for three different time periods (given in rows 1-3). Coloured dots show the values of individual stations, with solid dots for statistically significant O<sub>3</sub> trends and transparent dots otherwise. Also shown are linear fits for O<sub>3</sub> trends and NO, NO<sub>2</sub> trends in different time periods.**

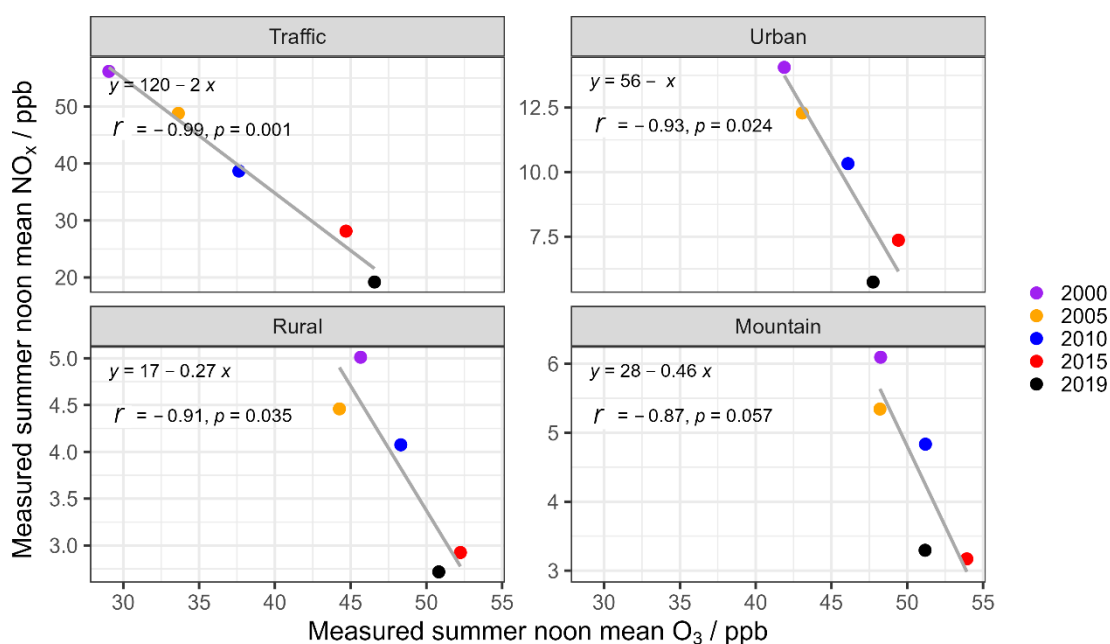

70 **Figure S4: Linear correlations between measured averaged noon (12:00 - 13:00) NO<sub>x</sub> and O<sub>3</sub> in ppb of four station types in summer over 5 years (2000, 2005, 2010, 2015 and 2019). For better comparability with mass-based concentrations elsewhere in the manuscript, conversion factors of NO<sub>x</sub> ( $\mu\text{g m}^{-3}$ )  $\approx 1.5 \times \text{NO}_x$  (ppb) and O<sub>3</sub> ( $\mu\text{g m}^{-3}$ )  $\approx 2 \times \text{O}_3$  (ppb) can be used.**

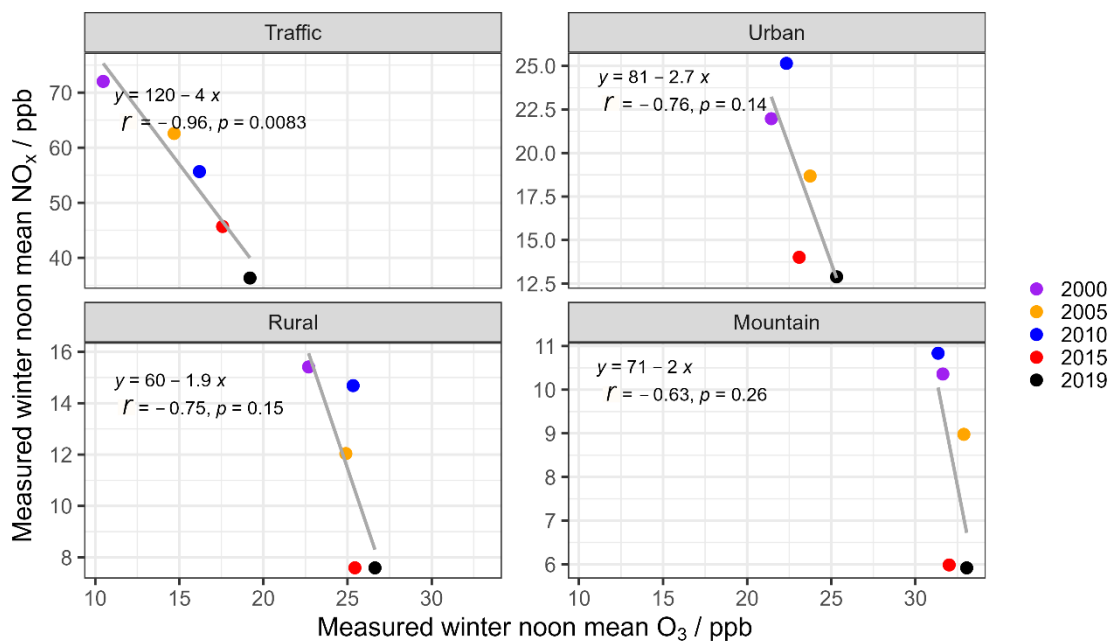

75 **Figure S5: Linear correlations between measured averaged noon (12:00 - 13:00)  $\text{NO}_x$  and  $\text{O}_3$  in ppb of four station types in winter over 5 years (2000, 2005, 2010, 2015 and 2019). For better comparability with mass-based concentrations elsewhere in the manuscript, conversion factors of  $\text{NO}_x$  ( $\mu\text{g m}^{-3}$ )  $\approx 1.5 \times \text{NO}_x$  (ppb) and  $\text{O}_3$  ( $\mu\text{g m}^{-3}$ )  $\approx 2 \times \text{O}_3$  (ppb) can be used.**

#### Definition of the normalized mean bias factor (NMBF) as a model performance evaluation metric

80 The hourly average concentrations of  $\text{NO}$ ,  $\text{O}_3$ , and  $\text{NO}_2$  observed ( $O$ ) across rural background sites in Saxony are calculated in the same way as the modelled hourly averages ( $M$ ). To evaluate the model performance for each pollutant, the NMBF is used as a statistical metric (Yu et al., 2006; Jaidan et al., 2018), defined as follows:

$$NMBF = \frac{\sum_{i=1}^n (M_i - O_i)}{\sum_{i=1}^n O_i}$$

where  $n$  is the number of hourly mean values for  $\text{NO}$ ,  $\text{O}_3$  and  $\text{NO}_2$ .

85

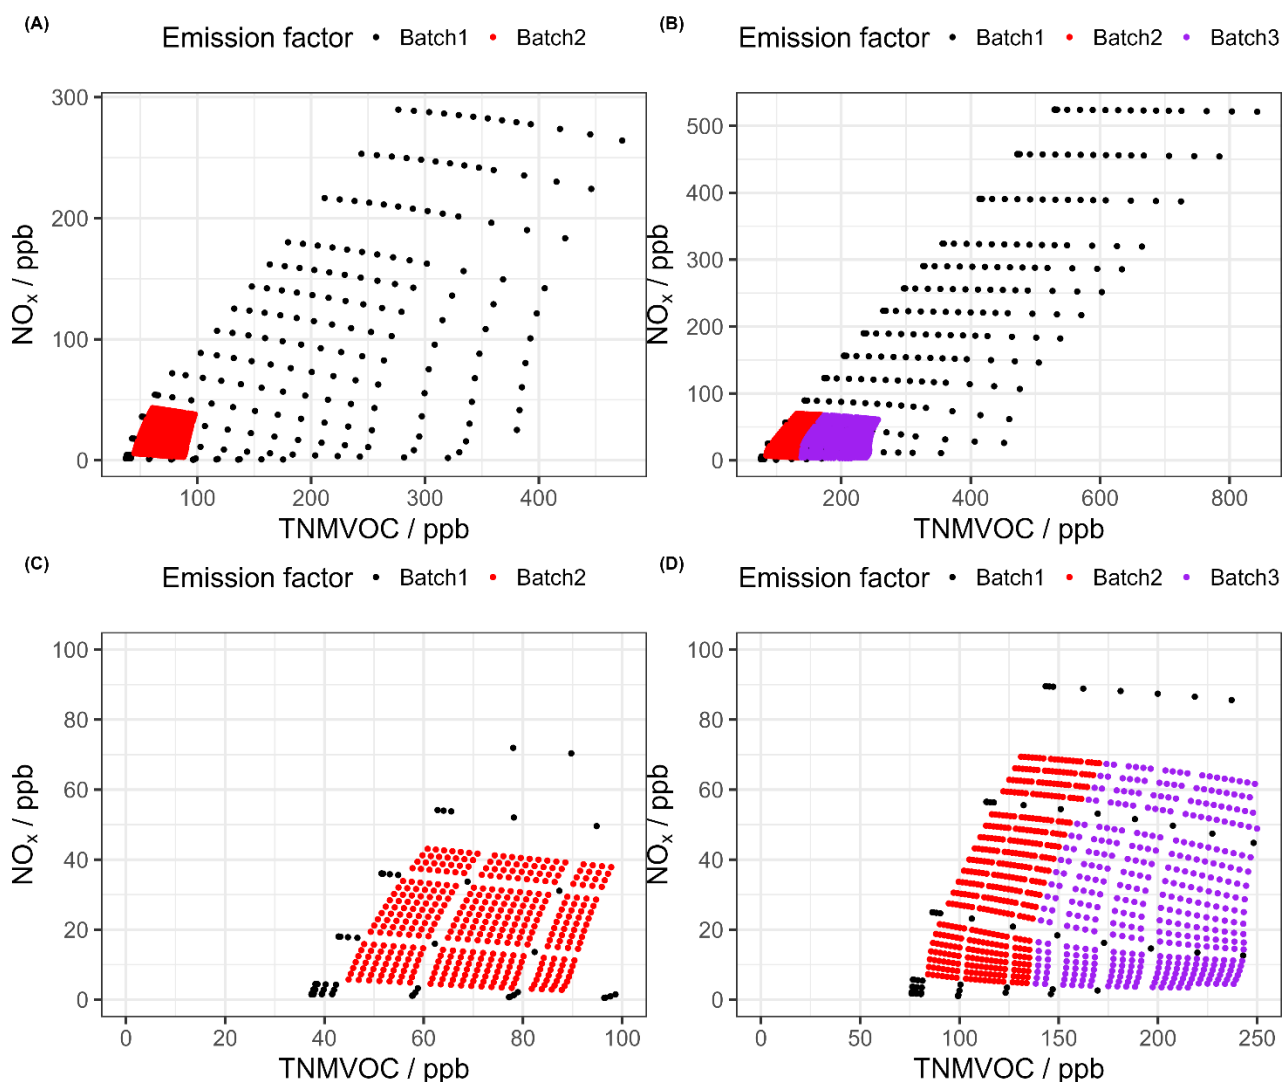

Figure S6: The distribution of resulting TNMVOC and  $\text{NO}_x$  concentrations (in ppb) based on a total of 800 and 1200 model runs (see Table S6 for details) for summer (A) and winter (B), respectively. Panels C (summer) and D (winter) are subsets of Panels A and B, respectively, and use the same concentration coordinate ranges as Fig. S7. The different colors indicate different batch runs.

90

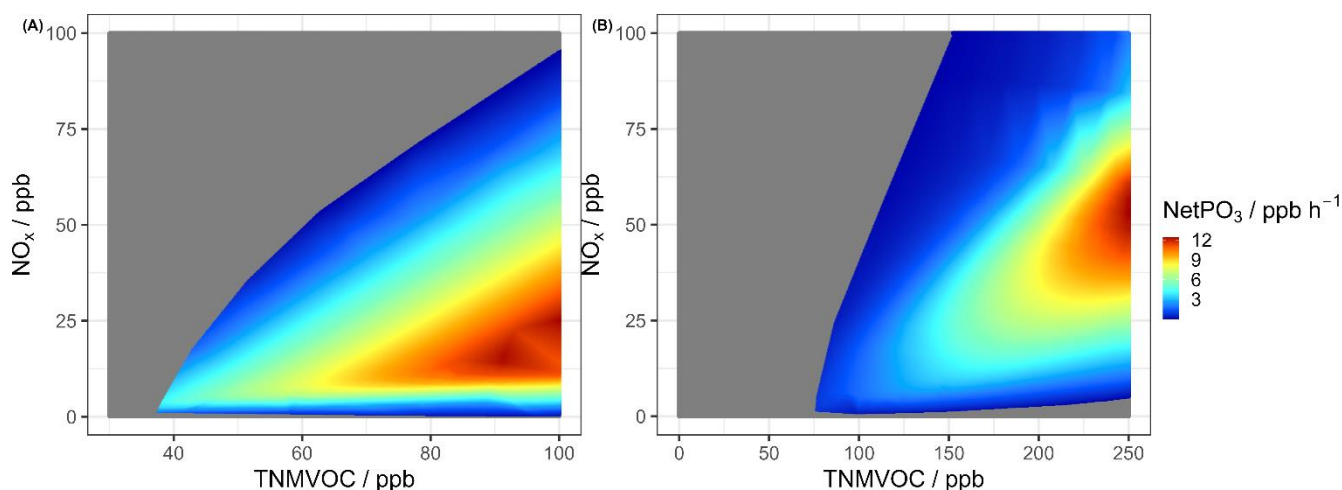

Figure S7: The grid of modelled net  $\text{O}_3$  production rate ( $\text{NetPO}_3$  in  $\text{ppb h}^{-1}$ ) during 12:00 - 13:00 CET as a function of both modelled and emission inventory-derived  $\text{NO}_x$  and TNMVOC concentrations (in ppb) (see Sect. 2.3) after bivariate linear interpolation. The X-axis and Y-axis in both summer (A) and winter (B) are interpolated using a very fine-resolved  $1000 \times 1000$  grid.  $\text{NetPO}_3$  is shown using a rainbow color scale.

95

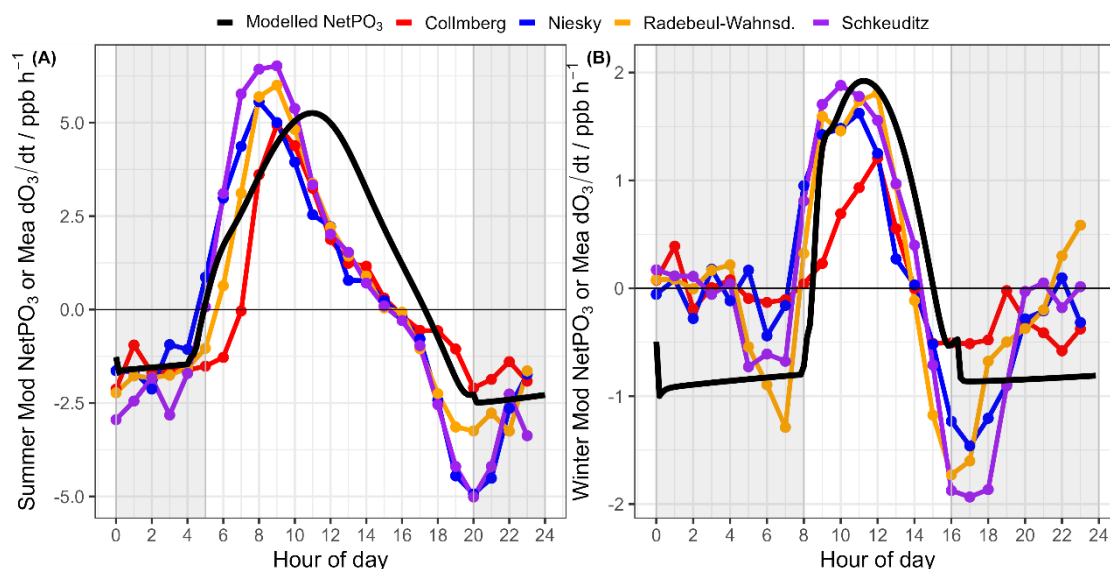

**Figure S8:** Diurnal profiles of the modelled net O<sub>3</sub> production rate (NetPO<sub>3</sub> in ppb h<sup>-1</sup>) and measured O<sub>3</sub> change rate (dO<sub>3</sub>/dt, ppb h<sup>-1</sup>) in Saxony at rural background sites (A and B for summer and winter cases, respectively). Shaded areas indicate night-time, black line indicates the modelled NetPO<sub>3</sub> and other coloured lines refer to the observed dO<sub>3</sub>/dt at each station. Linear correlation coefficient (r) between modelled and measured rates is larger than 0.8 in both seasons.

**Table S9.** TNMVOC concentrations for the summer scenario used to include station type data into the isopleth diagram (Fig. 10 A). These are derived from comparing measured and modelled NO<sub>x</sub>, as well as measured dO<sub>3</sub>/dt and modelled NetPO<sub>3</sub> values.

| Year | Period | Hour   | Station type | Measured        |                     | Modelled        |                     |        |
|------|--------|--------|--------------|-----------------|---------------------|-----------------|---------------------|--------|
|      |        |        |              | NO <sub>x</sub> | dO <sub>3</sub> /dt | NO <sub>x</sub> | NetPO <sub>3</sub>  | TNMVOC |
|      |        |        |              | ppb             | ppb h <sup>-1</sup> | ppb             | ppb h <sup>-1</sup> | ppb    |
| 2000 | Summer | 6 - 12 | Traffic      | 65.22           | 2.74                | 65.27           | 2.74                | 91.87  |
| 2000 | Summer | 6 - 12 | Urban        | 19.07           | 4.13                | 19.02           | 4.13                | 54.06  |
| 2000 | Summer | 6 - 12 | Rural        | 8.49            | 2.89                |                 |                     |        |
| 2000 | Summer | 6 - 12 | Mountain     | 7.15            | 1.20                |                 |                     |        |
| 2005 | Summer | 6 - 12 | Traffic      | 59.17           | 3.69                | 59.16           | 3.69                | 90.70  |
| 2005 | Summer | 6 - 12 | Urban        | 18.27           | 4.27                | 18.22           | 4.27                | 53.80  |
| 2005 | Summer | 6 - 12 | Rural        | 7.06            | 3.45                |                 |                     |        |
| 2005 | Summer | 6 - 12 | Mountain     | 6.22            | 1.16                |                 |                     |        |
| 2010 | Summer | 6 - 12 | Traffic      | 45.62           | 3.87                | 45.65           | 3.87                | 78.79  |
| 2010 | Summer | 6 - 12 | Urban        | 15.08           | 4.63                | 15.12           | 4.63                | 52.05  |
| 2010 | Summer | 6 - 12 | Rural        | 5.94            | 3.42                |                 |                     |        |
| 2010 | Summer | 6 - 12 | Mountain     | 5.53            | 1.18                |                 |                     |        |
| 2015 | Summer | 6 - 12 | Traffic      | 34.27           | 4.32                | 34.23           | 4.32                | 69.81  |
| 2015 | Summer | 6 - 12 | Urban        | 11.48           | 4.75                | 11.51           | 4.75                | 48.60  |
| 2015 | Summer | 6 - 12 | Rural        | 4.96            | 3.73                |                 |                     |        |
| 2015 | Summer | 6 - 12 | Mountain     | 3.94            | 1.30                |                 |                     |        |
| 2019 | Summer | 6 - 12 | Traffic      | 23.87           | 4.55                | 23.82           | 4.55                | 60.64  |
| 2019 | Summer | 6 - 12 | Urban        | 9.59            | 4.88                | 9.61            | 4.87                | 46.91  |
| 2019 | Summer | 6 - 12 | Rural        | 4.54            | 3.89                |                 |                     |        |
| 2019 | Summer | 6 - 12 | Mountain     | 3.67            | 1.64                |                 |                     |        |

**Table S10. TNMVOC concentrations for the winter scenario used to include station type data into the isopleth diagram (Fig. 10 B). These are derived from comparing measured and modelled NO<sub>x</sub>, as well as measured dO<sub>3</sub>/dt and modelled NetPO<sub>3</sub> values.**

| Year | Period | Hour   | Station type | Measured        |                     | Modelled        |                     |        |
|------|--------|--------|--------------|-----------------|---------------------|-----------------|---------------------|--------|
|      |        |        |              | NO <sub>x</sub> | dO <sub>3</sub> /dt | NO <sub>x</sub> | NetPO <sub>3</sub>  | TNMVOC |
|      |        |        |              | ppb             | ppb h <sup>-1</sup> | ppb             | ppb h <sup>-1</sup> | ppb    |
| 2000 | Winter | 8 - 12 | Traffic      | 80.56           | 0.78                | 80.58           | 0.78                | 178.88 |
| 2000 | Winter | 8 - 12 | Urban        | 31.48           | 1.45                | 31.43           | 1.46                | 108.46 |
| 2000 | Winter | 8 - 12 | Rural        | 16.38           | 0.97                |                 |                     |        |
| 2000 | Winter | 8 - 12 | Mountain     | 10.46           | 0.69                |                 |                     |        |
| 2005 | Winter | 8 - 12 | Traffic      | 68.96           | 0.85                | 68.97           | 0.85                | 164.34 |
| 2005 | Winter | 8 - 12 | Urban        | 23.16           | 1.22                | 23.12           | 1.22                | 92.69  |
| 2005 | Winter | 8 - 12 | Rural        | 12.87           | 0.99                |                 |                     |        |
| 2005 | Winter | 8 - 12 | Mountain     | 8.42            | 0.44                |                 |                     |        |
| 2010 | Winter | 8 - 12 | Traffic      | 63.24           | 0.98                | 63.26           | 0.98                | 157.86 |
| 2010 | Winter | 8 - 12 | Urban        | 29.75           | 1.32                | 29.73           | 1.32                | 104.25 |
| 2010 | Winter | 8 - 12 | Rural        | 15.34           | 1.30                |                 |                     |        |
| 2010 | Winter | 8 - 12 | Mountain     | 10.08           | 0.68                |                 |                     |        |
| 2015 | Winter | 8 - 12 | Traffic      | 55.01           | 1.42                | 55.06           | 1.42                | 150.50 |
| 2015 | Winter | 8 - 12 | Urban        | 20.24           | 1.61                | 20.22           | 1.61                | 93.22  |
| 2015 | Winter | 8 - 12 | Rural        | 9.11            | 1.17                |                 |                     |        |
| 2015 | Winter | 8 - 12 | Mountain     | 5.97            | 0.48                |                 |                     |        |
| 2019 | Winter | 8 - 12 | Traffic      | 43.47           | 1.59                | 43.44           | 1.59                | 131.06 |
| 2019 | Winter | 8 - 12 | Urban        | 18.16           | 1.65                | 18.12           | 1.65                | 90.94  |
| 2019 | Winter | 8 - 12 | Rural        | 8.85            | 1.17                |                 |                     |        |
| 2019 | Winter | 8 - 12 | Mountain     | 5.67            | 0.35                |                 |                     |        |

110

**Table S11. The species list of NMVOCs measured by online thermodesorption gas chromatography with flame ionization detection in Borna, south of Leipzig, Germany.**

| Number | Compounds              |
|--------|------------------------|
| 1      | 1-Butene               |
| 2      | 1-Hexene               |
| 3      | 1-Pentene              |
| 4      | 1,2,3-Trimethylbenzene |
| 5      | 1,2,4-Trimethylbenzene |
| 6      | 1,3-Butadiene          |
| 7      | 1,3,5-Trimethylbenzene |
| 8      | 2-Methylheptane        |
| 9      | 2-Methylhexane         |
| 10     | 2-Methylpentane        |
| 11     | 2,2-Dimethylbutane     |
| 12     | 2,2,4-Trimethylpentane |
| 13     | 2,3-Dimethylbutane     |
| 14     | 2,3-Dimethylpentane    |
| 15     | 2,3,4-Trimethylpentane |
| 16     | 2,4-Dimethylpentane    |
| 17     | 3-Methylheptane        |
| 18     | 3-Methylhexane         |
| 19     | 3-Methylpentane        |
| 20     | a-Pinene               |
| 21     | Acetylene              |

|    |                    |
|----|--------------------|
| 22 | b-Pinene           |
| 23 | Benzene            |
| 24 | cis-2-Butene       |
| 25 | cis-2-Pentene      |
| 26 | Cyclohexane        |
| 27 | Cyclopentane       |
| 28 | Ethane             |
| 29 | Ethene             |
| 30 | Ethylbenzene       |
| 31 | i-Butane           |
| 32 | i-Butene           |
| 33 | i-Pentane          |
| 34 | i-Propylbenzene    |
| 35 | Isoprene           |
| 36 | Limonene           |
| 37 | m-Diethylbenzene   |
| 38 | m-Ethyltoluene     |
| 39 | m,p-Xylene         |
| 40 | Methylcyclohexane  |
| 41 | Methylcyclopentane |
| 42 | n-Butane           |
| 43 | n-Decane           |
| 44 | n-Dodecane         |
| 45 | n-Heptane          |
| 46 | n-Hexane           |
| 47 | n-Nonane           |
| 48 | n-Octane           |
| 49 | n-Pentane          |
| 50 | n-Propylbenzene    |
| 51 | n-Undecane         |
| 52 | o-Ethyltoluene     |
| 53 | o-Xylene           |
| 54 | p-Diethylbenzene   |
| 55 | p-Ethyltoluene     |
| 56 | Propane            |
| 57 | Propene            |
| 58 | Styrene            |
| 59 | Toluene            |
| 60 | trans-2-Butene     |
| 61 | trans-2-Pentene    |
| 62 | 1-Hexene           |
| 63 | 2,2-Dimethylbutane |
| 64 | 3-Methylpentane    |
| 65 | Butadiene          |
| 66 | n-Hexane           |

---

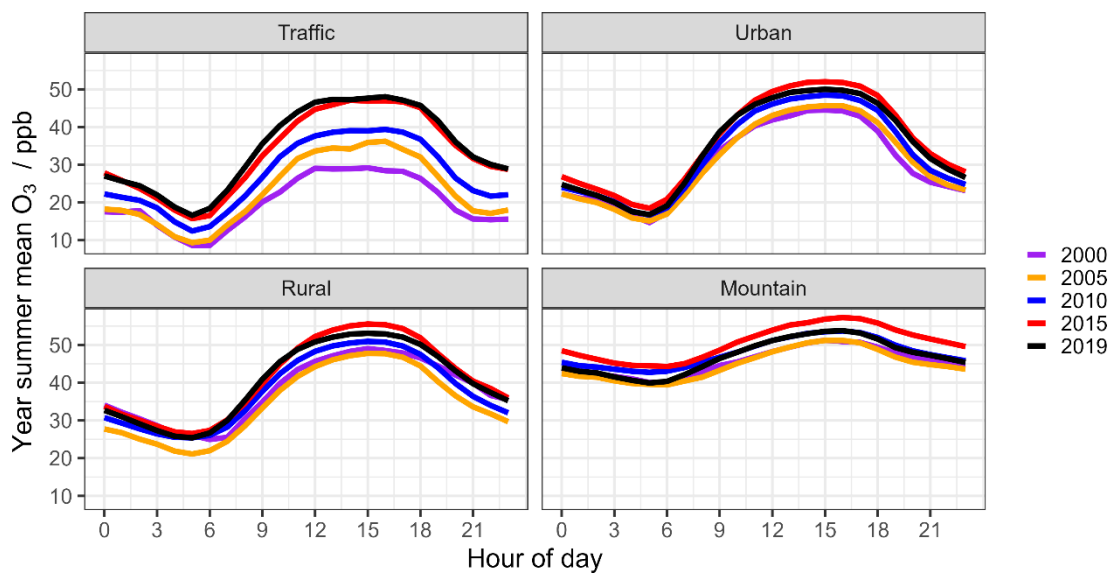

Figure S9: Diurnal profiles of hourly averaged measured  $O_3$  in summer over five years (2000, 2005, 2010, 2015, and 2019) across four station types.

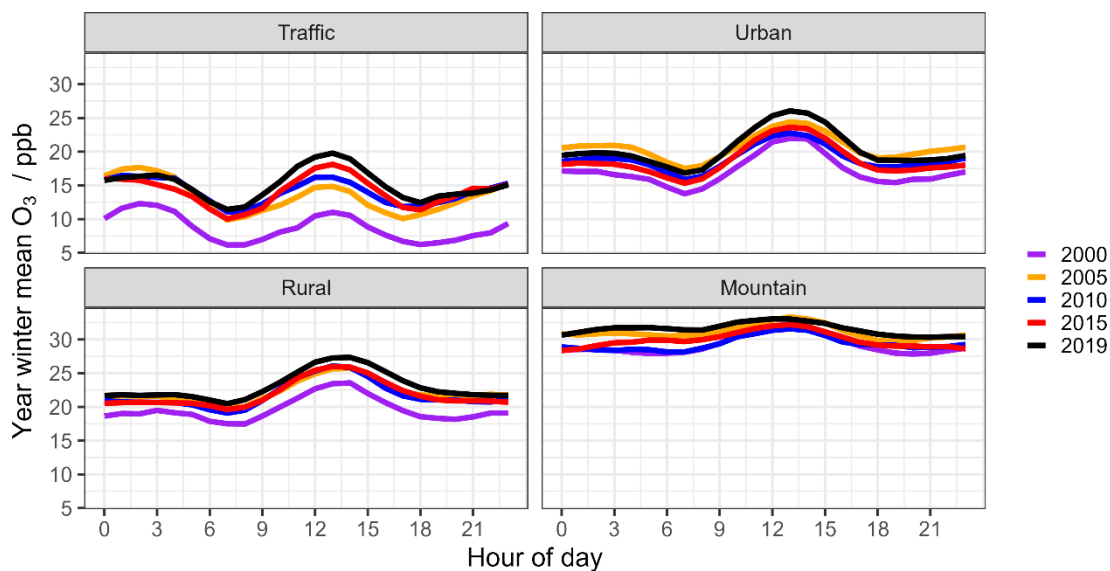

Figure S10: Diurnal profiles of hourly averaged measured  $O_3$  in winter over five years (2000, 2005, 2010, 2015, and 2019) across four station types.

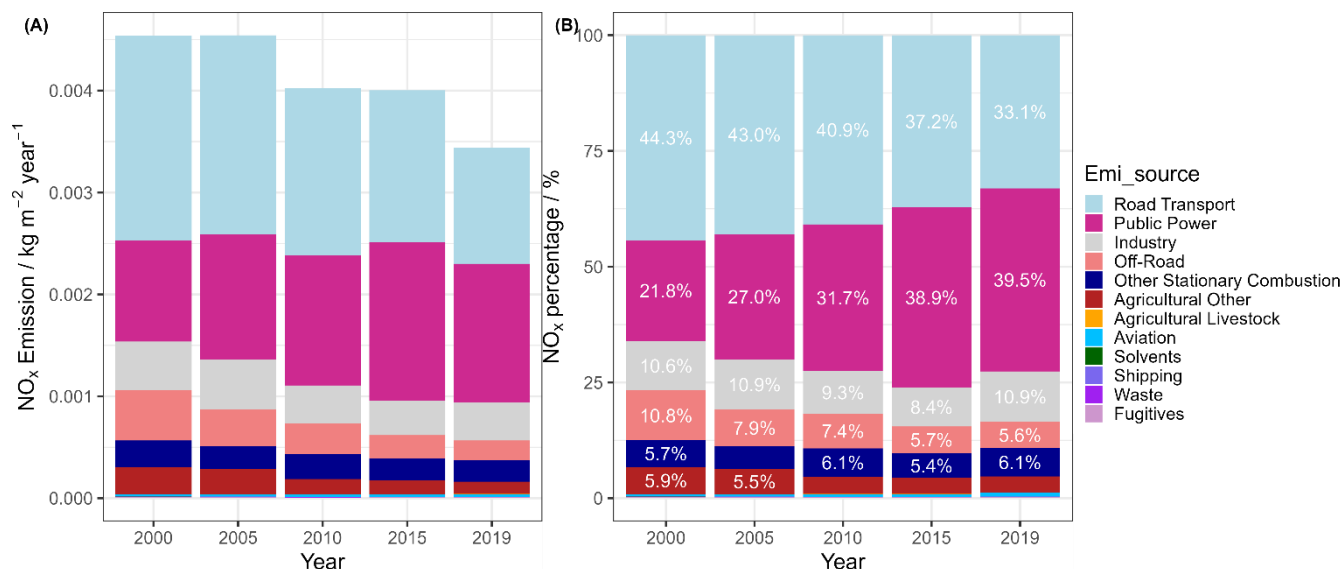

**Figure S11: Anthropogenic emissions of NO<sub>x</sub> in Saxony for five years between 2000 and 2019. Emission data were obtained by averaging values for each year across the approximated area of the entire state of Saxony (see Fig. S1). Details of the emission categories and corresponding emission sectors can be found in Table S13.**

125

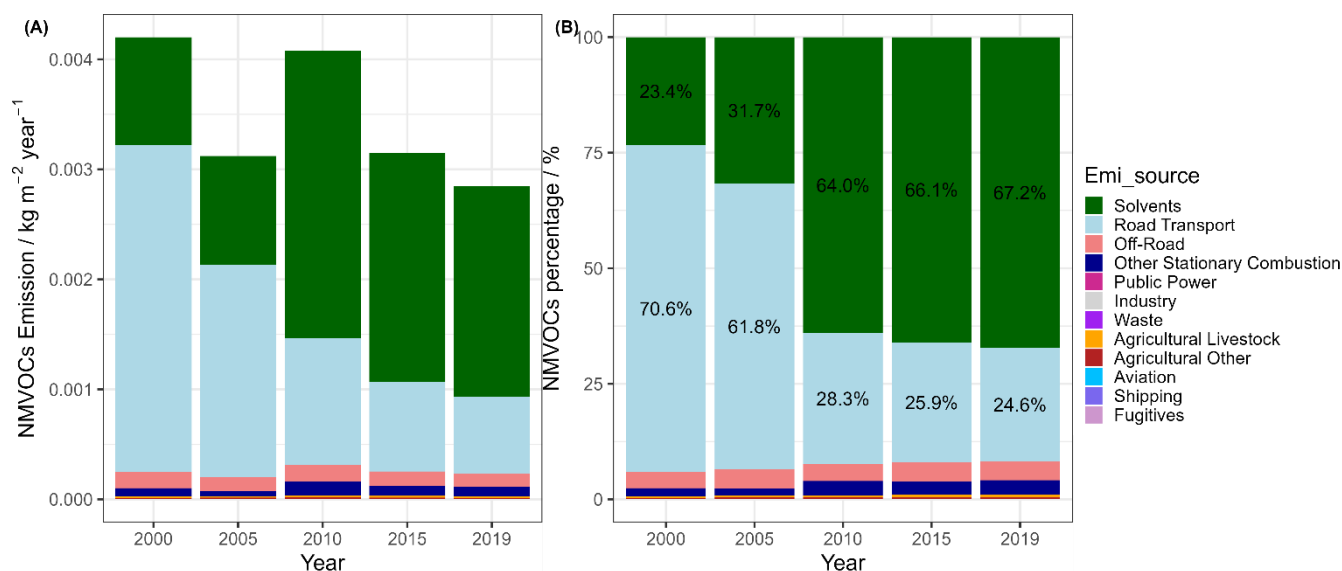

**Figure S12: Anthropogenic emissions of NMVOCs in traffic area for five years between 2000 and 2019. Emission data were obtained by averaging values for each year from the selected traffic-dominated area (see Fig. S1). Details of the emission categories and corresponding emission sectors can be found in Table S13.**

130



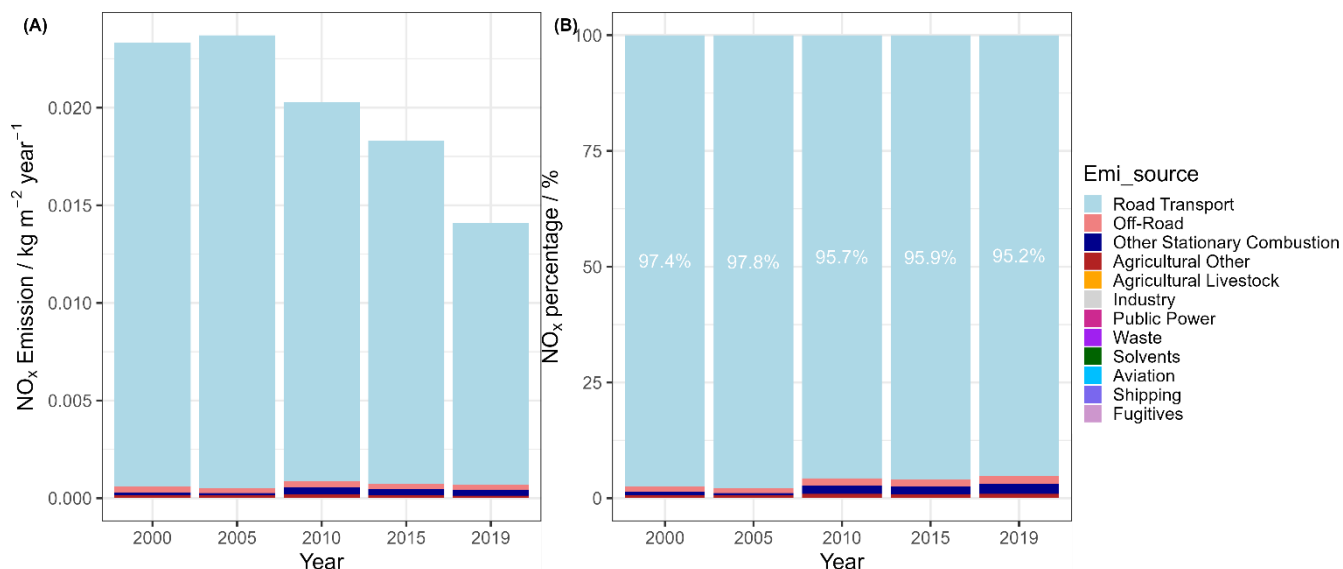

**Figure S13: Anthropogenic emission of NO<sub>x</sub> in traffic area for five years between 2000 and 2019. Emission data were obtained by averaging values for each year from the selected traffic-dominated area (see Fig. S1). Details of the emission categories and corresponding emission sectors can be found in Table S13.**

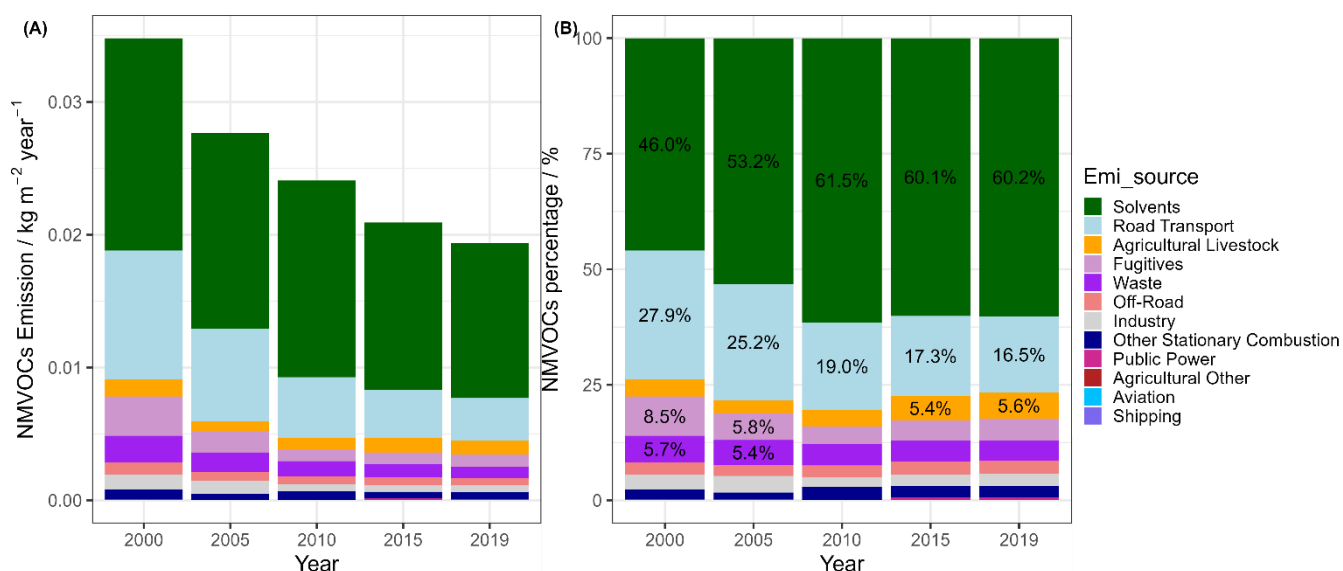

**Figure S14: Anthropogenic emission of NMVOCs in urban area for five years between 2000 and 2019. Emission data were obtained by averaging values for each year from the selected urban area (city of Leipzig) (see Fig. S1). Details of the emission categories and corresponding emission sectors can be found in Table S13.**

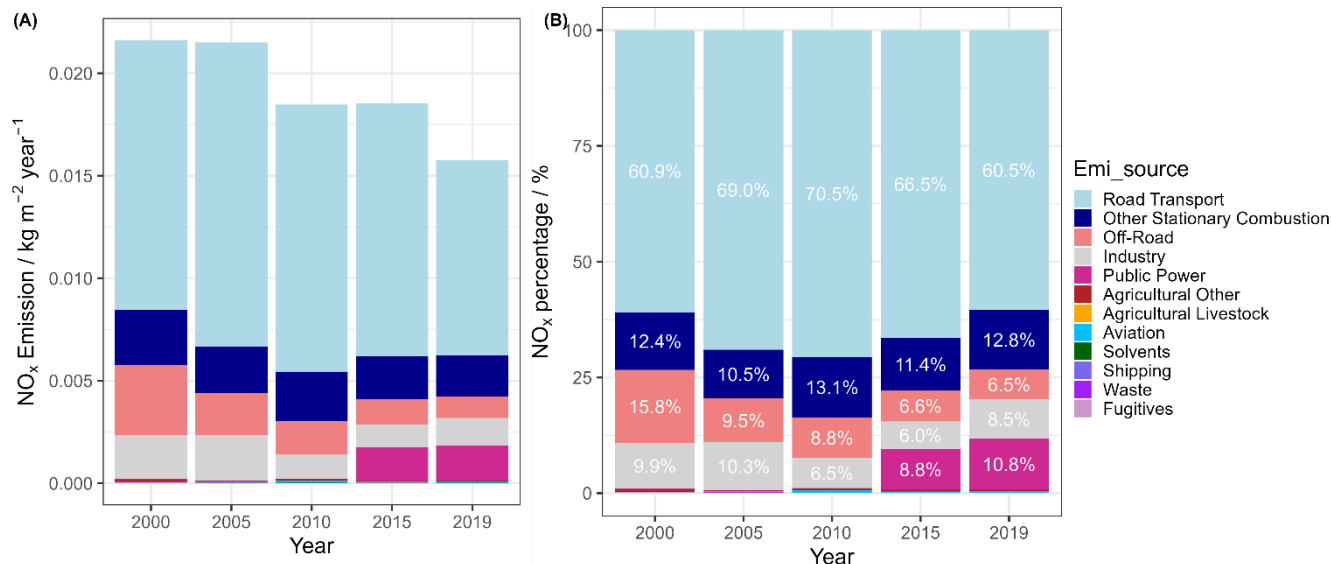

**Figure S15: Anthropogenic emission NO<sub>x</sub> in urban area for five years between 2000 and 2019.** Emission data were obtained by averaging values for each year from the selected urban area (city of Leipzig) (see Fig. S1). Details of the emission categories and corresponding emission sectors can be found in Table S13.

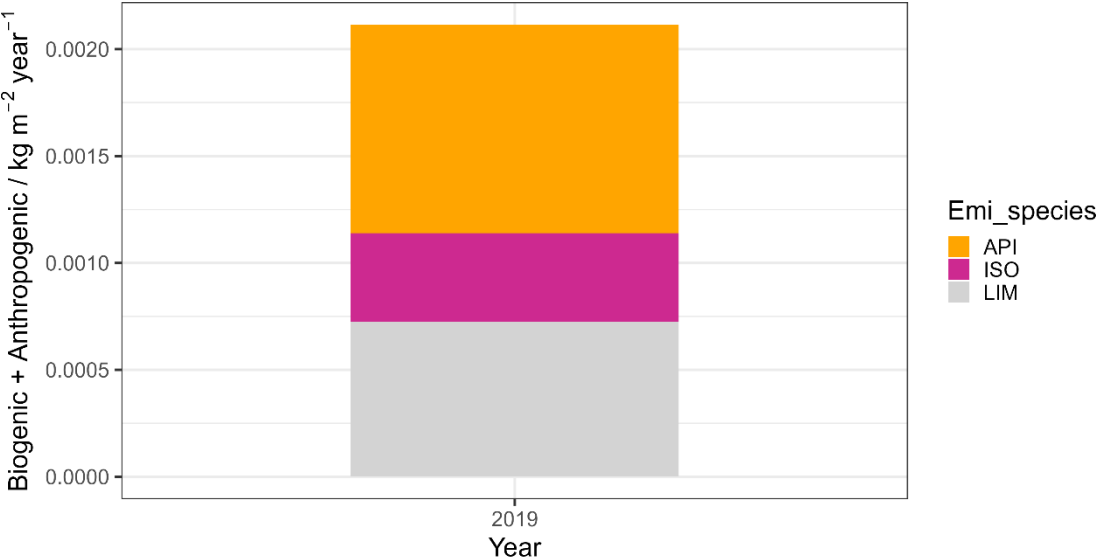

**Figure S16: Biogenic emissions of isoprene (ISO) and alpha-pinene (API) in Saxony for the year 2019, along with anthropogenic and biogenic emission data for limonene (LIM) in the same year.** Emission data were obtained by averaging values across the approximated area of the entire state of Saxony (see Fig. S1). The emission data source is from the German Environment Agency (UBA) for Germany and Thürkow et al. (2024). Detailed data can be referred to Table S12.

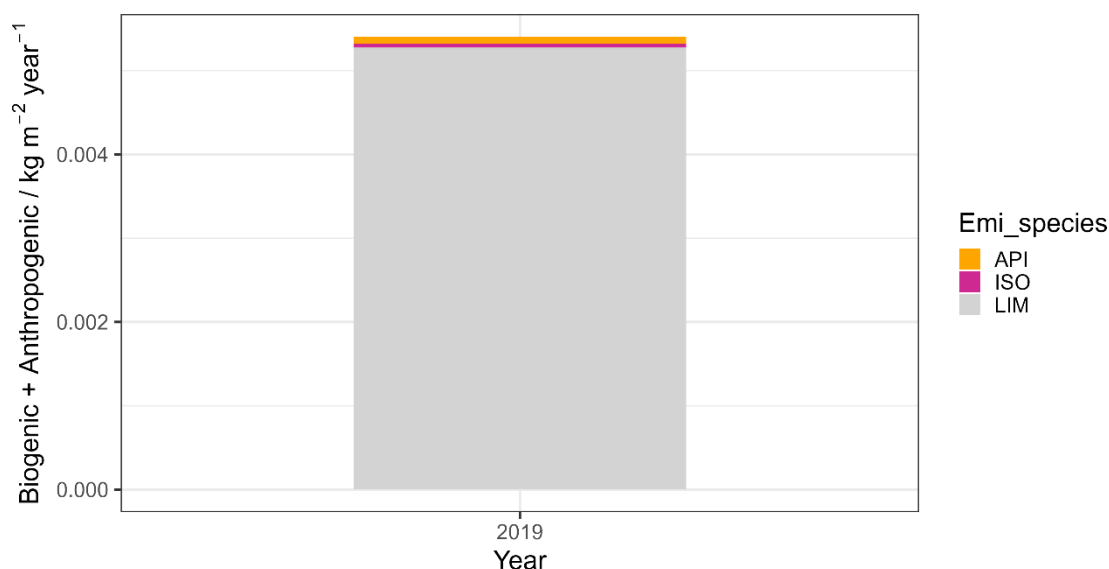

**Figure S17: Biogenic emissions of isoprene (ISO) and alpha-pinene (API) in urban area for the year 2019, along with anthropogenic and biogenic emission data for limonene (LIM) in the same year.** Emission data were obtained by averaging values from the selected urban area (city of Leipzig) (see Fig. S1). The emission data source is from the German Environment Agency (UBA) for Germany and Thürkow et al. (2024). Detailed data can be referred to Table S12.

**Table S12. A summary of the emission data from Figs. S16 and S17.**

| Emission species | Emission source                      | Saxony                                           | Leipzig-urban |
|------------------|--------------------------------------|--------------------------------------------------|---------------|
|                  |                                      | Emission / kg m <sup>-2</sup> year <sup>-1</sup> |               |
| Alpha-pinene     | Biogenic emissions                   | 0.00098                                          | 0.00008       |
| Isoprene         | Biogenic emissions                   | 0.00041                                          | 0.00005       |
| Limonene         | Anthropogenic and biogenic emissions | 0.00073                                          | 0.00528       |

**Table S13: Emission categories and corresponding emission sectors (Schneider et al., 2016).**

See attached Excel file named *Table S13\_Emission categories and corresponding emission sectors*.

## Reference

- Clifton, O. E., Fiore, A. M., Massman, W. J., Baublitz, C. B., Coyle, M., Emberson, L., Fares, S., Farmer, D. K., Gentine, P., and Gerosa, G.: Dry deposition of ozone over land: processes, measurement, and modeling, *Reviews of Geophysics*, 58, e2019RG000670, <https://doi.org/10.1029/2019RG000670>, 2020.
- Herrmann, H., Ervens, B., Jacobi, H.-W., Wolke, R., Nowacki, P., and Zellner, R.: CAPRAM2. 3: A chemical aqueous phase radical mechanism for tropospheric chemistry, *Journal of Atmospheric Chemistry*, 36, 231-284, <https://doi.org/10.1023/A:1006318622743>, 2000.
- Hoffmann, E. H., Tilgner, A., Vogelsberg, U., Wolke, R., and Herrmann, H.: Near-explicit multiphase modeling of halogen chemistry in a mixed urban and maritime coastal area, *ACS Earth Space Chem.*, 3, 2452-2471, <https://doi.org/10.1021/acsearthspacechem.9b00184>, 2019.
- Jaidan, N., El Amraoui, L., Attié, J.-L., Ricaud, P., and Dulac, F.: Future changes in surface ozone over the Mediterranean Basin in the framework of the Chemistry-Aerosol Mediterranean Experiment (ChArMEx), *Atmospheric Chemistry and Physics*, 18, 9351-9373, <https://doi.org/10.5194/acp-18-9351-2018>, 2018.

- Pandey Deolal, S., Henne, S., Ries, L., Gilge, S., Weers, U., Steinbacher, M., Staehelin, J., and Peter, T.: Analysis of elevated springtime levels of Peroxyacetyl nitrate (PAN) at the high Alpine research sites Jungfraujoch and Zugspitze, *Atmospheric Chemistry and Physics*, 14, 12553-12571, <https://doi.org/10.5194/acp-14-12553-2014>, 2014.
- 180 Python Software Foundation: Python Language Reference, version 3.10. <http://www.python.org>, 2021.
- Rondón, A., Johansson, C., and Granat, L.: Dry deposition of nitrogen dioxide and ozone to coniferous forests, *Journal of Geophysical Research: Atmospheres*, 98, 5159-5172, <https://doi.org/10.1029/92JD02335>, 1993.
- Schneider, C., Pelzer, M., Toenges-Schuller, N., Nacken, M., and Niederau, A.: ArcGIS basierte Lösung zur detaillierten, deutschlandweiten Verteilung (Gridding) nationaler Emissionsjahreswerte auf Basis des Inventars zur
- 185 Emissionsberichterstattung, Dessau. Roßlau Retrieved, 27, 2019, <https://www.umweltbundesamt.de>, 2016.
- Stieger, B., Spindler, G., Fahlbusch, B., Müller, K., Grüner, A., Poulain, L., Thöni, L., Seitler, E., Wallasch, M., and Herrmann, H.: Measurements of PM 10 ions and trace gases with the online system MARGA at the research station Melpitz in Germany—A five-year study, *Journal of Atmospheric Chemistry*, 75, 33-70, <https://doi.org/10.1007/s10874-017-9361-0>, 2018.
- Thürkow, M., Schaap, M., Kranenburg, R., Pfäfflin, F., Neunhäuserer, L., Wolke, R., Heinold, B., Stoll, J., Lupaşcu, A., and
- 190 Nordmann, S.: Dynamic evaluation of modeled ozone concentrations in Germany with four chemistry transport models, *Science of the Total Environment*, 906, 167665, <https://doi.org/10.1016/j.scitotenv.2023.167665>, 2024.
- Wu, Z., Wang, X., Turnipseed, A. A., Chen, F., Zhang, L., Guenther, A. B., Karl, T., Huey, L., Niyogi, D., and Xia, B.: Evaluation and improvements of two community models in simulating dry deposition velocities for peroxyacetyl nitrate (PAN) over a coniferous forest, *Journal of Geophysical Research: Atmospheres*, 117, D04310, <https://doi.org/10.1029/2011JD016751>,
- 195 2012.
- Yu, S., Eder, B., Dennis, R., Chu, S. H., and Schwartz, S. E.: New unbiased symmetric metrics for evaluation of air quality models, *Atmospheric Science Letters*, 7, 26-34, <https://doi.org/10.1002/asl.125>, 2006.
- Zellweger, C., Hüglin, C., Klausen, J., Steinbacher, M., Vollmer, M., and Buchmann, B.: Inter-comparison of four different carbon monoxide measurement techniques and evaluation of the long-term carbon monoxide time series of Jungfraujoch,
- 200 *Atmospheric Chemistry and Physics*, 9, 3491-3503, <https://doi.org/10.5194/acp-9-3491-2009>, 2009.
- Zhu, Y., Tilgner, A., Hoffmann, E. H., Herrmann, H., Kawamura, K., Yang, L., Xue, L., and Wang, W.: Multiphase MCM–CAPRAM modeling of the formation and processing of secondary aerosol constituents observed during the Mt. Tai summer campaign in 2014, *Atmospheric Chemistry and Physics*, 20, 6725-6747, <https://doi.org/10.5194/acp-20-6725-2020>, 2020.
